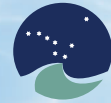

## Contribution to Special Issue: 'Towards a Broader Perspective on Ocean Acidification Research Part 2' Original Article

# Effects of elevated $p\text{CO}_2$ on crab survival and exoskeleton composition depend on shell function and species distribution: a comparative analysis of carapace and claw mineralogy across four porcelain crab species from different habitats

Tessa M. Page<sup>1</sup>, Samantha Worthington<sup>2</sup>, Piero Calosi<sup>2,3</sup>, and Jonathon H. Stillman<sup>1,4\*</sup>

<sup>1</sup>Romberg Tiburon Center and Department of Biology, San Francisco State University, 3150 Paradise Drive, Tiburon, CA 94920, USA

<sup>2</sup>Marine Biology and Ecology Research Center, Plymouth University, Drake Circus, Plymouth, England PL4 8AA, UK

<sup>3</sup>Département de Biologie, Chimie et Géographie, Université du Québec à Rimouski, 300 Allée des Ursulines, Rimouski, Québec G5L 3A1, Canada

<sup>4</sup>Department of Integrative Biology, University of California, Berkeley, Valley Life Sciences Building no. 3140, Berkeley, CA 94720-3140, USA

\*Corresponding author: tel.: (415) 338-3790; fax: (415) 435-7120; e-mail: [stillmaj@sfsu.edu](mailto:stillmaj@sfsu.edu)

Page, T. M., Worthington, S., Calosi, P., and Stillman, J. H. Effects of elevated  $p\text{CO}_2$  on crab survival and exoskeleton composition depend on shell function and species distribution: a comparative analysis of carapace and claw mineralogy across four porcelain crab species from different habitats. – ICES Journal of Marine Science, 74: 1021–1032.

Received 10 May 2016; revised 19 October 2016; accepted 8 October 2016; advance access publication 6 December 2016.

Elevated concentration of carbon dioxide (elevated  $p\text{CO}_2$ ) that cause reduced pH is known to influence calcification in many marine taxa, but how elevated  $p\text{CO}_2$  influences cation composition of mineralized structures is less well studied. To a large extent, the degree to which elevated  $p\text{CO}_2$  impacts mineralized structures is influenced by physiological adaptation of organisms to environments where low pH is routinely experienced. Here, we test the hypotheses that elevated  $p\text{CO}_2$  will differently impact the relative concentrations of divalent cations ( $\text{Ca}^{2+}$ ,  $\text{Mg}^{2+}$ ,  $\text{Sr}^{2+}$ , and  $\text{Mn}^{2+}$ ) in four closely related species of porcelain crabs distributed across intertidal zone gradients. Cation composition of carapace and claw exoskeleton was determined using inductively coupled plasma mass spectrometry following 24-day exposures to pH/ $p\text{CO}_2$  levels of 8.0/418 and 7.4/1850  $\mu\text{atm}$  during the intermoult period. Reduced pH/elevated  $p\text{CO}_2$  caused a 13–24% decrease of carapace [ $\text{Ca}^{2+}$ ] across all species, and species-specific responses in carapace and claw [ $\text{Mg}^{2+}$ ], [ $\text{Sr}^{2+}$ ] and [ $\text{Mn}^{2+}$ ] were observed. During a 24-day exposure, reduced pH/elevated  $p\text{CO}_2$  reduced survival probability in low-intertidal but not mid-intertidal species. Overall, the effect of reduced pH/elevated  $p\text{CO}_2$  on exoskeleton mineral composition was muted in mid-intertidal species relative to low-intertidal species, indicating that extant adaptation to the variable intertidal zone may lessen the impact of ocean acidification (OA) on maintenance of mineralized structures. Differences in responses to reduced pH/elevated  $p\text{CO}_2$  among closely related species adds complexity to predictive inferences regarding the effects of OA.

**Keywords:** acclimation, calcification, calcium, intertidal zone, magnesium, manganese, ocean acidification, pH, strontium.

## Introduction

Crustacean mineralized exoskeletons provide physical and physiological protection from mechanical loads, predation and desiccation (Nagasawa, 2012). Mineralized structures in crustaceans are composed mainly of calcium carbonate, but vary in composition and mineral properties across body parts and within and

across species (Boßelmann *et al.*, 2007). In addition to calcium ( $\text{Ca}^{2+}$ ), exoskeletons of marine calcifying organisms include other divalent cations including magnesium ( $\text{Mg}^{2+}$ ), manganese ( $\text{Mn}^{2+}$ ), and strontium ( $\text{Sr}^{2+}$ ) (de Lima *et al.*, 2011). Replacement of  $\text{Ca}^{2+}$  with  $\text{Mg}^{2+}$ ,  $\text{Sr}^{2+}$ , and  $\text{Mn}^{2+}$  alters structural and functional properties (Baden and Eriksson, 2006; Boßelmann

*et al.*, 2007), and in crustaceans is associated with the processes of molting (Tao *et al.*, 2009), and hardening of the exoskeleton (Horne and Tarsitano, 2007).

Carbon dioxide (CO<sub>2</sub>) is increasing in the atmosphere at an unprecedented rate (Pachauri and Meyer, 2014) and being absorbed by the world's oceans (Sabine *et al.*, 2004) causing a reduction in seawater pH (Meehl *et al.*, 2007), a phenomenon known as ocean acidification (OA). Following the recommendation of McElhany (2017) we have adopted the convention of referring to physiological responses as resulting from exposure to reduced pH driven by elevated concentration of CO<sub>2</sub> (reduced pH/elevated pCO<sub>2</sub>), and restricting the usage of response to OA as ecological or evolutionary response to natural variation in environmental pH/pCO<sub>2</sub> over temporal or spatial scales.

Calcifying organisms are sensitive to reduced pH/elevated pCO<sub>2</sub> (Kroeker *et al.*, 2010). In particular, organisms buffer the effects of reduced environmental pH by liberating ions from calcified tissues (Wheatly *et al.*, 1991; Calosi *et al.*, 2013a; Rastrick *et al.*, 2014). Crustaceans use CaCO<sub>3</sub> in their carapace to buffer the extracellular effects of acidosis by extracting carbonate ions (CO<sub>3</sub><sup>2-</sup>) from the carapace to bind with free protons (H<sup>+</sup>) and form bicarbonate (HCO<sub>3</sub><sup>-</sup>) (Wheatly *et al.* 1991; Michaelidis *et al.* 2005). Accordingly, reduced pH/elevated pCO<sub>2</sub> increases rates of mineralized exoskeleton dissolution (Bednaršek *et al.*, 2012).

Reduced pH/elevated pCO<sub>2</sub> is also known to cause shifts in exoskeletal cation composition in a wide range of taxa, including crustaceans (e.g. Wickins, 1984), molluscs (Ries, 2011), echinoderms (Miles *et al.*, 2007), and corals (Cohen *et al.*, 2009). For example, reduced pH/elevated pCO<sub>2</sub> increased intermolt exoskeleton Ca<sup>2+</sup> content in adults of the prawns *Penaeus occidentalis* and *Penaeus monodon* (Wickins, 1984), decreased Ca<sup>2+</sup> in spider crab larval exoskeleton (Walther *et al.*, 2011), decreased Mg<sup>2+</sup> in European lobster *Homarus gammarus* larval exoskeleton, and increased Mg<sup>2+</sup> in claw exoskeleton of the velvet swimming crab (Small *et al.*, 2010). Changes in exoskeleton ion composition shift skeletal strength (Chan *et al.*, 2012), so mineralization dynamics involved with acid-base regulation may cause weaker exoskeletons, increasing vulnerability to predation and other stressors (Amaral *et al.*, 2012).

Differences in physiological response to reduced pH/elevated pCO<sub>2</sub> have been observed among closely related species living in different pH environments: e.g. molluscs (Parker *et al.*, 2010; Maas *et al.* 2012), crustaceans (Lewis *et al.*, 2013), echinoderms (Byrne *et al.* 2013; Calosi *et al.* 2013a), and polychaete worms (Calosi *et al.*, 2013b). Physiological responses to reduced pH/elevated pCO<sub>2</sub> also vary within a species across pelagic and benthic life history stages, as has been demonstrated for the intertidal zone porcelain crab *Petrolisthes cinctipes* (Ceballos-Osuna *et al.*, 2013). Intertidal zones are pH/pCO<sub>2</sub> variable environments (Morris and Taylor, 1983), and organisms inhabiting intertidal regions are adapted to tolerate a dynamic environment (Magozzi and Calosi, 2015). However, intertidal zone organisms experience environmental conditions at their physiological tolerance limits (Stillman and Somero, 2000). Climate warming is predicted to increase the intensity and frequency of coastal upwelling of reduced pH/elevated pCO<sub>2</sub> seawater (Gruber *et al.*, 2012). If present pH variability of the intertidal zone is close to physiological tolerance limits (Stillman and Paganini, 2015), there could be detrimental impacts of OA and climate warming (Paganini *et al.* 2014).

We hypothesized that under reduced pH/elevated pCO<sub>2</sub> mid-intertidal zone organisms would defend exoskeleton mineralization to a greater extent than low-intertidal organisms due to their adaptation to variable environments. We tested this hypothesis in four species of porcelain crabs from different intertidal zones and oceanic regions. Porcelain crabs serve as a good model for comparative research because closely related species occupy different geographic locations and intertidal zones (Stillman and Somero, 2000). We examined exoskeleton mineralogy changes in two pairs of vertically zoned porcelain crab species. One species pair is *P. cinctipes* from the mid-intertidal zone and *Petrolisthes manimaculis* from the low-intertidal to shallow subtidal of the temperate Northeastern Pacific along the west coast of the United States (Morris *et al.*, 1980). The other species pair is *Porcellana platycheles* from the mid-intertidal zone and *Pisidia longicornis* from the low-intertidal to shallow subtidal of the English coast of the North Atlantic (Davenport, 1972). We measured survival and cation concentrations of two regions of the exoskeleton, claw and carapace, following acclimation to pH/pCO<sub>2</sub> values representing current and predicted levels according to the IPCC's (2013) worst case scenario (RCP8.5 Figure 12.12; Collins *et al.*, 2013).

## Material and methods

### Experimental design

Four confamilial species of intertidal porcelain crabs were compared between two geographic locations: Northeastern Pacific (United States) and Northeastern Atlantic (United Kingdom), and two intertidal zones: mid- and low-intertidal zone. Experiments were conducted at the Stillman Laboratory at the Romberg Tiburon Center (San Francisco, CA, USA) for the Pacific species and at the Marine Biology and Ecology Research Centre (MBERC) at Plymouth University (Plymouth, UK) for the Atlantic species, hence the methods are separately described for each location.

### Animal collection

Similarly sized (carapace ~ 8–15 mm), adult male *P. cinctipes* and *P. manimaculis* were collected during low tide from the rocky intertidal zone in Pacifica, California (37°36'4" N, 122°29'57" W) on the 13th of January 2013. Crabs were transported to San Francisco State University Romberg Tiburon Center for Environmental Studies (Tiburon, California), transport time < 1.5 h. Seawater was collected during high tide from San Francisco Bay and sediment was allowed to settle for ≥ 1 week before use. Crabs were held in a common garden aquarium for 11 d in constant conditions (*T* = 12 °C, *S* = 34.0, pH 8.0) with daily water changes. Crabs were fed daily ~50 µL (~500 million cells) of Shellfish Diet 1800 (Reed Mariculture, Inc, Campbell, CA, USA, <http://www.reedmariculture.com>), an algal mixture of 30% *Isochrysis sp.*, 20% *Pavlova sp.*, 20% *Thalassiosira weissflogii*, and 30% *tetraselmis sp.*

Adult males (carapace ~ 7–10 mm) *P. platycheles* were collected during low tide from the rocky intertidal zone from Batten Bay, Plymouth, UK (50°21'22.91" N, 4°7'39.03" W) on the 29 of May 2013. Adult males (carapace ~ 2–5 mm) *P. longicornis* were collected during low tide from the rocky intertidal zone in Hannafore, Cornwall, UK (50°20'37.54" N, 4°27'4.18" W) on the 28 of June 2013. Crabs were transported to Plymouth University (Plymouth, UK), transport time < 2.5 h., and held together in a common garden aquarium for 11 d in constant ambient

temperature ( $T = 15^\circ\text{C}$ ,  $S = 33.5$ ,  $\text{pH} 8.1$ ) with daily water changes. Seawater was collected from the Mount Batten pier (Plymouth, UK). Sediment was allowed to settle and water was filtered before use. Crabs were fed daily following the same procedure as stated above for the US experiments.

### Animal welfare

Animals in the United States and United Kingdom were kept in ambient, unfiltered seawater aquaria prior to experiment for 11 d. Daily water changes and cleanings of aquaria were done during this time, and animals were treated gently and fed daily. Upon end of experiment, animals were sacrificed in the least time possible to minimize any potential suffering.

### Experimental procedure

Individuals of *P. cinctipes* and *P. manimaculis* ( $n = 30$  per species) were haphazardly assigned to one of six treatment boxes ( $n = 10$  indiv. per treatment box and a  $n = 15$  indiv. per species per  $\text{pH}/p\text{CO}_2$  treatment). Individuals were placed in separate mesh-bottomed cylinders and kept in sealed treatment boxes (three replicate boxes per treatment) within water tables that were maintained at a constant temperature. Each box had minimal air space and was equipped with a manifold connected to a small submersible pump supplying recirculating treatment water to each cylinder. Crabs were fed daily with  $\sim 20$   $\mu\text{L}$  full concentration Shellfish Diet 1800. Complete water changes were performed daily 4 h after feeding for the duration of the 24-d experiment. Care was taken to not aerate or disturb the treatment water during changes so as to not alter the  $\text{pH}/p\text{CO}_2$  of the seawater. Salinity and temperature were checked daily using an YSI model 30 hand-held meter (Yellow Springs Instruments, OH, USA) and dissolved oxygen (DO) was tested weekly to every other week throughout the experiment using a YSI Pro20 hand-held meter. DO was always at or above 80% air saturation. Daily checks for molts and death were performed and molts or dead crabs were removed.

*P. platycheles* and *P. longicornis* were haphazardly assigned to experimental conditions and boxes to achieve an  $n = 15$  indiv. per species per treatment ( $n = 45$  total indiv. per species). Crabs were placed in 120 mL perforated, plastic, screw cap bottles and kept in sealed treatment boxes ( $n = 5$  indiv. per treatment box,  $n = 9$  treatment boxes). Treatment boxes were maintained at constant temperature within sea tables. Each treatment box was supplied with continuous water flow ( $40 \text{ mL min}^{-1}$ ) from a header tank with constant temperature and salinity ( $T = 15.2 \pm 0.3^\circ\text{C}$ ,  $S = 33.9 \pm 0.5$ ); this eliminated the need for water changes. Box positions were altered daily to eliminate any placement effect. Feeding and checking seawater parameters followed the same methods as stated in above paragraph for crabs in the United States.

### Water chemistry manipulation

Seawater  $\text{pH}/p\text{CO}_2$  in the United States was regulated by injection of pure  $\text{CO}_2$  gas controlled by a  $\text{pH}$  sensor (*sensu* Widdicombe and Needham, 2007). Two treatment mixing tanks, one designated to mimic ambient  $\text{pH}$  ( $\text{pH} 8.0$ ) and the other set to  $\text{pH} 7.4$  to mimic predicted, future, ocean  $\text{pH}$  according to the IPCC's (2013) worst case scenario (RCP8.5 Figure 12.12; Collins *et al.*, 2013). Treatment water in the United Kingdom was altered using  $\text{CO}_2$  enriched air *via* a modified and integrated version of the equilibration flow-through system used by Melatunan *et al.*

(2011). Three treatment header tanks were set to target  $\text{pH}$  levels of "ambient  $\text{pH}$ " ( $\text{pH} 8.0$ ) and "lowered  $\text{pH}$ " ( $\text{pH} 7.4$ ). Additionally, a treatment of "extreme lowered  $\text{pH}$ " ( $\text{pH} 7.0$ ) was included for the UK species, but only *P. platycheles* survived that  $\text{pH}$  level (data mainly presented in Supplementary Materials).

Seawater samples were taken in both the United States and United Kingdom to test  $\text{pH}/p\text{CO}_2$  levels with best possible practices at each location (Dickson *et al.*, 2007). We are confident as much as possible that the methods used allowed us to obtain  $\text{pH}/p\text{CO}_2$  levels that were comparable across geographical locations. Water samples in the United States were collected bi-weekly from treatment boxes and  $\text{CO}_2$  mixing tanks. Seawater  $\text{pH}$  was determined spectrophotometrically (Shimadzu UV-1700 PharmaSpec, Kyoto, Japan) following a protocol modified from SOP 6b (Dickson *et al.*, 2007). In the United Kingdom, samples were collected daily from a random assortment of boxes and  $\text{pH}$  was measured immediately using a  $\text{pH}$  meter (SevenEasy, Mettler Toledo GmbH, Schwerzenbach, Switzerland) with an electrode that was calibrated daily using a three-point calibration with NBS buffers 4.01, 7.00, and 9.21 (Technical buffer solution, Mettler Toledo AG, Schwerzenbach, 1V057B, 1V103B, 1W241D). All  $\text{pH}$  measurements in the United Kingdom were then converted to total scale (Noisette *et al.*, 2014).

In the United States, seawater samples (100 mL) for total alkalinity were collected once weekly from treatment boxes and  $\text{CO}_2$  mixing tanks, poisoned with 10 mL of saturated mercuric chloride solution in water (sat.  $\text{HgCl}_2$ ), and stored in acid washed glass bottles. Total alkalinity was determined by titration using a Metrohm dosimat 765  $\text{pH}$ -Meter (Metrohm, Herisau, Switzerland) following the method of Bradshaw *et al.* (1981). Water samples (100 mL) for total alkalinity in the United Kingdom were collected once weekly from treatment boxes using an identical protocol as in the United States. Total alkalinity was obtained using a fully automated Gran Alkalinity Titrator (Apollo SciTech As-alk2, Newark, DE, USA). The instrument system was equipped with a combination  $\text{pH}$  electrode (8102BNUWP, Thermo Scientific, MA, USA) and a temperature probe (Star ATC probe, Thermo Scientific) connected to a  $\text{pH}$  meter. LabVIEW (National Instruments Corporation, TX, USA) software was used to control the automated alkalinity analyzer and record total alkalinity values.

Remaining parameters of the seawater carbonate system were calculated using SeaCarb 2.4.10 (Lavigne *et al.*, 2013) in the statistical computing programme R v 3.0.1 (R Core Team, 2014) (Table 5). The following parameters were calculated:  $p\text{CO}_2$ ,  $[\text{HCO}_3^-]$ ,  $[\text{CO}_3^{2-}]$ , dissolved inorganic carbon (DIC),  $\Omega_{\text{calcite}}$  and  $\Omega_{\text{aragonite}}$ . Treatment water salinity, temperature,  $\text{pH}$  and total alkalinity were used as input parameters (seacarb, flag 8), using the total  $\text{pH}$  scale ( $\text{pH}_T$ ). Seawater carbonate system calculations (i.e. TA,  $p\text{CO}_2$ ,  $[\text{HCO}_3^-]$ ,  $[\text{CO}_3^{2-}]$ , DIC,  $\Omega_{\text{calcite}}$  and  $\Omega_{\text{aragonite}}$ ) from the US and UK were compared using Kruskal-Wallis rank sum tests (Supplementary Tables S8 and S9).

### Determination of exoskeleton ion concentration

After each of the 24-day experiments, crabs were euthanized, and carapace and left and right chelae were sampled using Teflon coated or plastic forceps. No metal dissecting tools were used in order to eliminate possible metal contamination. Exoskeleton parts were triple rinsed with MilliQ ultra pure water, blotted dry with filter paper and stored in 1.5 mL centrifuge tubes. *P. cinctipes*

and *P. manimaculis* exoskeleton samples were prepared in the United States and dried exoskeleton samples were transported to the United Kingdom facility for analysis.

Samples were prepared for inductively coupled plasma mass spectrometry (ICP-MS) analysis using an exoskeleton method modified from Jack *et al.* (2011). Carapace and left and right chelae were weighed to the nearest 0.1 mg with a max sample weight of 70.0 mg and digested in 2.5 ml nitric acid (75% TraceMetal™ Grade, Fisher Chemical, Loughborough, UK) and sent through a microwave reaction to complete the full digestion of the exoskeletal structure (MARS 6, CEM).

Ionic concentrations ( $^{24}\text{Mg}$ ,  $^{44}\text{Ca}$ ,  $^{55}\text{Mn}$ , and  $^{88}\text{Sr}$ ) were measured using ICP-MS X-Series II (Thermo Scientific, Hemel Hempstead, UK) using a method similar to Wolf and Adams (2015). Dilutions of prepared samples were made using a 2% nitric acid solution in MilliQ water (TraceMetal Grade, Fisher Chemical). Samples were run in triplicate and all elements were analysed simultaneously. Additionally, 200-fold dilutions were made for  $\text{Mg}^{2+}$  and  $\text{Ca}^{2+}$ .

### Statistical analyses

Survival was recorded and analysed after the 24-day experiment. Statistical analysis of survival probability was carried out in the *survival* package (v. 2.37-4) in R statistical program (v 3.0.1). Kruskal-Wallis rank sum tests were done to test significant differences in survival probability among species and across intertidal zone locations.

The effect of pH/ $p\text{CO}_2$  on ions within the claw and carapace of the four porcelain crab species were analysed by linear regression model and ANCOVA. The  $\alpha$  level to reject the null hypothesis was set to 0.05 and linear hypotheses with  $p$ -values below this threshold were considered to represent statistically significant effects. The intercept from each linear regression was set to test amount of ion present and the  $p$ -value tested the sensitivity of that ion to pH/ $p\text{CO}_2$ . For the ANCOVA, each ion was set as the dependent variable, pH/ $p\text{CO}_2$  was set as the factor, and species was set as the covariate. Analyses were repeated with and without the interaction of pH/ $p\text{CO}_2$  and species to test the significance of the slope and the effect of pH/ $p\text{CO}_2$  and species on the slope of the line obtained from linear regression.

The effect of intertidal zone on the sensitivity of ions to pH/ $p\text{CO}_2$  was compared using a two-way ANOVA testing pH/ $p\text{CO}_2$  treatment and intertidal location as independent or combined fixed factors depending on best-fit model, which was obtained through best fit modeling *via* Akaike information criterion (AIC). Data were tested for normality using QQ normality plots. Tukey HSD post hoc comparisons were made to identify statistically significant pairwise differences between treatments and intertidal location. Values reported in the text are mean SEM.

Cation concentration ratios were obtained for  $[\text{Ca}^{2+}]$  to  $[\text{Mg}^{2+}]$  and  $[\text{Ca}^{2+}]$  to  $[\text{Sr}^{2+}]$  by using the following equation (1):

$$\frac{\frac{[\text{Ca}^{2+}(\text{low})]}{[\text{Mg}^{2+}(\text{low})]}}{\frac{[\text{Ca}^{2+}(\text{avg})]}{[\text{Mg}^{2+}(\text{avg})]}} \quad (\text{e.g. for Ca/Mg ratio})$$

(1)The effect of reduced pH/elevated  $p\text{CO}_2$  on the ratio was found through subtracting “1.0” or “ambient” from the obtained value from equation (1) at pH 7.4. A negative response implied a decrease in  $[\text{Ca}^{2+}]$  or an increase in  $[\text{Mg}^{2+}]$  or  $[\text{Sr}^{2+}]$  with reduced

pH/elevated  $p\text{CO}_2$ . Ratios were compared by two-way ANOVA with pH/ $p\text{CO}_2$  treatment and intertidal location as independent or combined fixed factors.

## Results

### Survival and condition

There was no significant effect of reduced pH/elevated  $p\text{CO}_2$  on survival in *P. cinctipes*, *P. manimaculis*, or *P. platycheles* (Supplementary Figure S1). However, survival probability decreased with reduced pH/elevated  $p\text{CO}_2$  in *P. longicornis* (Figure 1), as 50% mortality was observed at day 17 in pH 7.4 (Kruskal Wallis Chi-squared = 8.3,  $p < 0.001$ , Supplementary Table S2), and 100% mortality at day 7 in pH 7.0 (Kruskal Wallis Chi-squared = 12.3,  $p < 0.0001$ , Supplementary Table S2, Supplementary Figure S1). Depigmentation, through loss of the exocuticle, and autotomization were observed under reduced pH/elevated  $p\text{CO}_2$  conditions, though were less pronounced in the mid-intertidal zone crabs *P. cinctipes* and *P. platycheles* (Figure 2).

### Exoskeleton ion concentration

#### Differences in mineralization status of carapace & claw

Total ion content of mineralized exoskeleton under ambient pH/ $p\text{CO}_2$  conditions (pH 8.0) varied across species and anatomy (Table 1).  $[\text{Ca}^{2+}]$  ranged from 5 to 68 mol  $\text{kg}^{-1}$ ,  $[\text{Mg}^{2+}]$  ranged from 0.6 to 8 mol  $\text{kg}^{-1}$ ,  $[\text{Sr}^{2+}]$  ranged from 20 to 45 mmol  $\text{kg}^{-1}$ , and  $[\text{Mn}^{2+}]$  ranged from 0.3 to 7.3 mmol  $\text{kg}^{-1}$  (Table 1). When comparing  $[\text{Mn}^{2+}]$  across species,  $[\text{Mn}^{2+}]$  was at least 93% higher in *P. platycheles* carapace and claw.  $[\text{Ca}^{2+}]$  was found to be almost 10-fold higher in claw than carapace in all species with the exception of *P. longicornis*, in which carapace  $[\text{Ca}^{2+}]$  was 15% higher than claw.  $[\text{Sr}^{2+}]$  was 22 to 54% higher in carapace than claw in all four species (Table 1).  $[\text{Ca}^{2+}]$  was highest in carapace and claw of *P. manimaculis* and  $[\text{Sr}^{2+}]$  was highest in carapace of *P. manimaculis* ( $[\text{Ca}^{2+}]$  14 to 37% higher in carapace and 8–1246% higher in claw,  $[\text{Sr}^{2+}]$  15 to 84% higher in carapace).

#### Changes in skeletal mineralization status caused by exposure to low pH

We observed species-specific changes in exoskeletal cation concentrations following exposure to reduced pH/elevated  $p\text{CO}_2$  (Figure 3). Greatest changes occurred in claw exoskeleton (Tables 2 and 3) with exception of  $[\text{Sr}^{2+}]$ .  $[\text{Ca}^{2+}]$  decreased with decreasing pH across all species, but statistically significant decreases were only observed in the low-intertidal species, *P. manimaculis* and *P. longicornis*, where  $[\text{Ca}^{2+}]$  was 16 and 67% lower, respectively (ANOVA,  $p < 0.05$ , Table 2 and Supplementary Table S4, Figure 3). Under reduced pH/elevated  $p\text{CO}_2$ , claw exoskeleton  $[\text{Mg}^{2+}]$  decreased by 17% in *P. manimaculis*, 19% in *P. platycheles* and 28% in *P. longicornis* (ANOVA  $p < 0.05$ , Table 2 and Supplementary Table S4, Figure 3); however, did not change significantly in *P. cinctipes* (ANOVA  $p > 0.05$ , Table 2 and Supplementary Table S4, Figure 3).  $[\text{Mn}^{2+}]$  did not significantly change in *P. manimaculis*, *P. cinctipes* and *P. longicornis* with reduced pH/elevated  $p\text{CO}_2$  (ANOVA  $p > 0.05$ , Table 2 and Supplementary Table S4, Figure 3); however, it increased significantly in *P. platycheles* by 39% (ANOVA  $p < 0.05$ , Table 2 and Supplementary Table S4, Figure 3).  $[\text{Sr}^{2+}]$  decreased significantly with reduced pH/elevated  $p\text{CO}_2$  by 23% in *P. manimaculis*, 32% in *P. cinctipes*, and 105% in *P. longicornis* (ANOVA  $p < 0.05$ ,

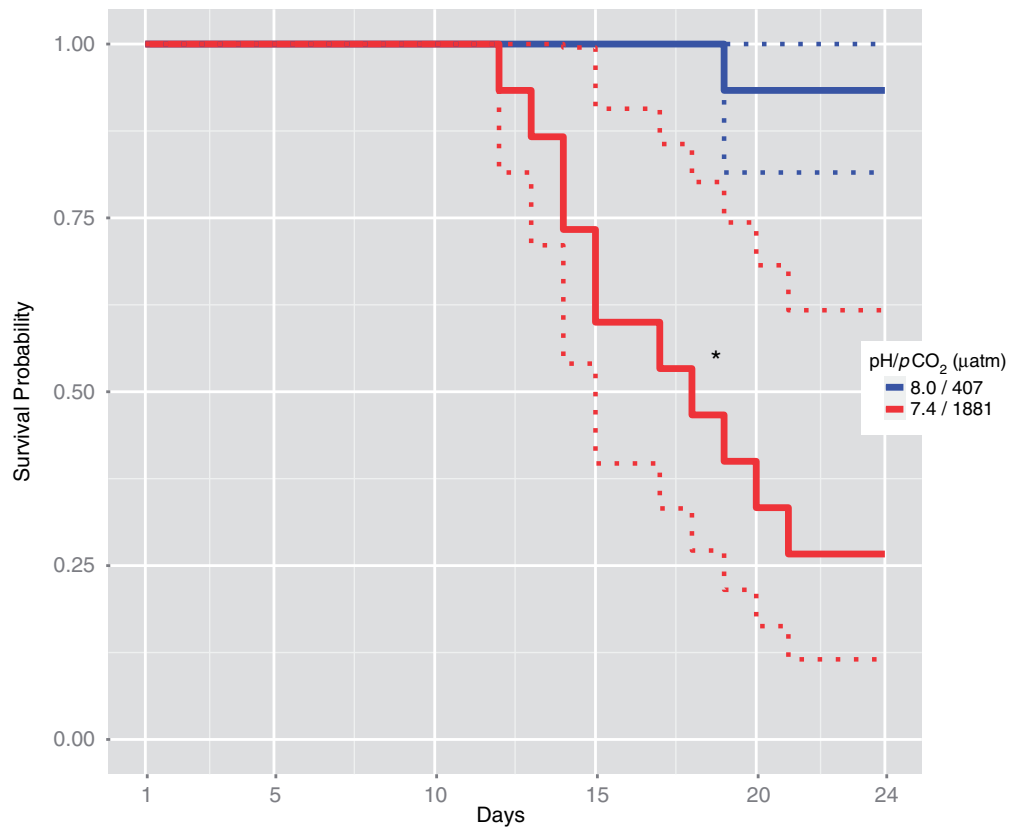

**Figure 1.** Survival probability of *P. longicornis* (L. 1767), the low-intertidal North Eastern Atlantic species, significantly decreased under reduced pH/elevated pCO<sub>2</sub>. Solid lines represent mean values, and dotted lines represent 95% confidence intervals. The asterisk indicates a statistically significant difference at  $p < 0.05$ .

Table 2 and Supplementary Table S6, Figure 3), but did not significantly change in *P. platycheles* (ANOVA  $p > 0.05$ , Table 2 and Supplementary Table S4, Figure 3).

Claw [Ca<sup>2+</sup>]:[Mg<sup>2+</sup>] increased with reduced pH/elevated pCO<sub>2</sub> by 70% in *P. manimaculis* (ANOVA  $p < 0.05$ , Table 4, Figures 3 and 4) and increased by 38% in *P. cinctipes* (ANOVA  $p < 0.05$ , Table 4, Figure 3). Claw [Ca<sup>2+</sup>]:[Mg<sup>2+</sup>] was found to decrease by 15% in *P. platycheles* (ANOVA  $p < 0.05$ , Table 4, Figures 3 and 4) but increased in *P. longicornis* by 8% (ANOVA  $p < 0.05$ , Table 4, Figure 3). [Ca<sup>2+</sup>]:[Sr<sup>2+</sup>] in the claw increased in the two North Eastern Pacific species by 70% for *P. manimaculis* and 38% for *P. cinctipes* (ANOVA  $p < 0.05$ , Table 4, Figure 4) and in *P. platycheles* by 10% (ANOVA  $p < 0.05$ , Table 4, Figure 3); however claw [Ca<sup>2+</sup>]:[Sr<sup>2+</sup>] decreased in *P. longicornis* by 80% (ANOVA  $p < 0.05$ , Table 4, Figure 4).

Carapace concentration of Ca<sup>2+</sup> ([Ca<sup>2+</sup>]) decreased under reduced pH/elevated pCO<sub>2</sub> by 13–24% across species (ANOVA,  $p < 0.05$ , Table 2 and Supplementary Table S3, Figure 3). Similarly, carapace [Mg<sup>2+</sup>] decreased under reduced pH/elevated pCO<sub>2</sub> by 21% in the low-intertidal zone species *P. manimaculis*, and by 28% in mid-intertidal species *P. platycheles* (ANOVA,  $p < 0.05$ , Table 2 and Supplementary Table S3, Figure 3). In contrast, carapace [Mg<sup>2+</sup>] did not change under reduced pH/elevated pCO<sub>2</sub> in the mid-intertidal species *P. cinctipes* or the low-intertidal species *P. longicornis* (ANOVA,  $p > 0.05$ , Table 2 and Supplementary Table S3, Figure 3). Carapace [Mn<sup>2+</sup>] increased by 49% under reduced pH/elevated pCO<sub>2</sub> in *P. platycheles* (ANOVA,  $p < 0.05$ ,

Table 2 and Supplementary Table S3, Figure 3). However, carapace [Mn<sup>2+</sup>] was lower and did not change under reduced pH/elevated pCO<sub>2</sub> in the other species (ANOVA,  $p > 0.05$ , Table 2 and Supplementary Table S3, Figure 3). Overall, carapace [Sr<sup>2+</sup>] decreased across all species under reduced pH/elevated pCO<sub>2</sub> (ANOVA,  $p > 0.05$ , Table 2 and Supplementary Table S3, Figure 3), decreasing by as much as 76% in *P. manimaculis* between pH 8.0 to pH 7.4 (ANOVA,  $p < 0.05$ , Table 2 and Supplementary Table S3, Figure 3).

Carapace [Ca<sup>2+</sup>]:[Mg<sup>2+</sup>] increased under reduced pH/elevated pCO<sub>2</sub> by 15–20% in *P. cinctipes* and *P. manimaculis* (ANOVA  $p < 0.05$ , Table 4, Figures 3 and 4), but decreased under reduced pH/elevated pCO<sub>2</sub> by 60% in *P. longicornis* (ANOVA  $p < 0.05$ , Table 4, Figures 3 and 4). Carapace [Ca<sup>2+</sup>]:[Mg<sup>2+</sup>] in *P. platycheles* was not significantly affected by reduced pH/elevated pCO<sub>2</sub> (ANOVA  $p > 0.05$ , Table 4, Figures 3 and 4). Carapace [Ca<sup>2+</sup>]:[Sr<sup>2+</sup>] of the two low-intertidal zone species increased under reduced pH/elevated pCO<sub>2</sub>, by 55% in *P. manimaculis* and by 5% in *P. longicornis* (ANOVA  $p < 0.05$ , Table 4, Figures 3 and 4), was unchanged in the two mid-intertidal zone species, *P. cinctipes* and *P. platycheles* (ANOVA  $p > 0.05$ , Table 4, Figures 3 and 4).

#### Effect of intertidal zone location on ion concentration

Claw [Ca<sup>2+</sup>] and [Mg<sup>2+</sup>] in *P. platycheles*, *P. cinctipes*, and *P. manimaculis* were orders of magnitude higher than in the low-intertidal *P. longicornis* at both pH/pCO<sub>2</sub> levels (ANOVA

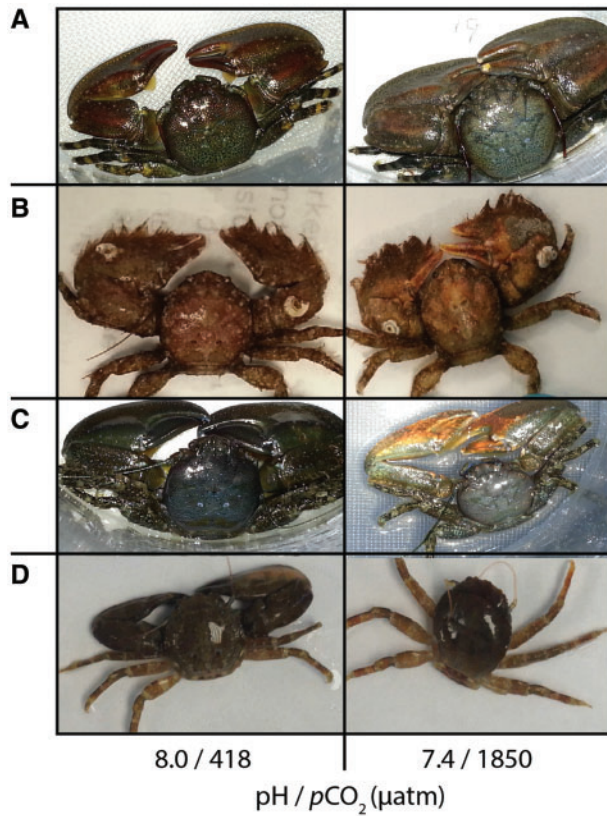

**Figure 2.** Coloration and condition of representative specimens of four porcelain crab species (a) *P. cinctipes* (mid-intertidal zone, California USA), (b) *P. platycheles* (id-intertidal zone, Plymouth UK), (c) *P. manimaculis* [lower intertidal zone, California, USA], and (d) *P. longicornis* (lower intertidal zone, Plymouth UK) following exposure to ambient and reduced pH/elevated  $p\text{CO}_2$ .

**Table 1.** Shows average concentrations of ions ( $\text{Ca}^{2+}$ ,  $\text{Mg}^{2+}$ ,  $\text{Mn}^{2+}$ ,  $\text{Sr}^{2+}$ ) after 24 days at pH 8.0 (ambient) across four porcelain crab species, *P. cinctipes*, *P. manimaculis*, *P. platycheles*, and *P. longicornis*, in both the carapace and claw. Concentrations in  $\text{mmol kg}^{-1}$

|                       | $\text{Ca}^{2+}$ | $\text{Mg}^{2+}$ | $\text{Mn}^{2+}$ | $\text{Sr}^{2+}$ |
|-----------------------|------------------|------------------|------------------|------------------|
| <b>Carapace</b>       |                  |                  |                  |                  |
| <i>P. cinctipes</i>   | 6301             | 606              | 0.5              | 38.7             |
| <i>P. manimaculis</i> | 7191             | 699              | 0.4              | 44.6             |
| <i>P. platycheles</i> | 5244             | 673              | 7.3              | 24.3             |
| <i>P. longicornis</i> | 5804             | 889              | 1.6              | 30.7             |
| <b>Claw</b>           |                  |                  |                  |                  |
| <i>P. cinctipes</i>   | 62751            | 6639             | 0.4              | 29.0             |
| <i>P. manimaculis</i> | 67787            | 7376             | 0.3              | 28.2             |
| <i>P. platycheles</i> | 55529            | 7720             | 2.7              | 20.0             |
| <i>P. longicornis</i> | 5036             | 768              | 1.4              | 26.8             |

$p < 0.05$ , Supplementary Table S6, Figure 5). Neither claw  $[\text{Ca}^{2+}]:[\text{Mg}^{2+}]$  or claw  $[\text{Ca}^{2+}]:[\text{Sr}^{2+}]$  varied with respect to intertidal zone (ANOVA  $p > 0.05$ , Figure 4, Supplementary Table S7).

Carapace  $[\text{Ca}^{2+}]$  of *P. platycheles* was 7% lower than *P. longicornis* at pH 8.0 (ANOVA  $p < 0.05$ , Table 1 and Supplementary Table S5, Figure 5) but not at pH 7.4 (ANOVA  $p > 0.05$ , Supplementary Table S5, Figure 5). Carapace  $[\text{Mg}^{2+}]$  in the

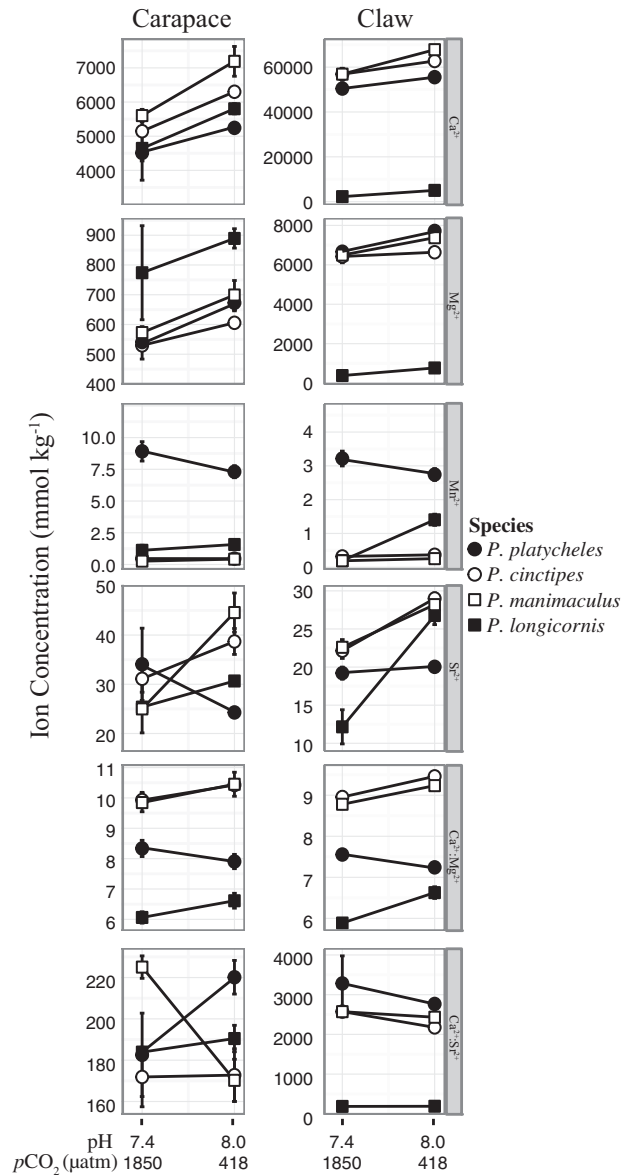

**Figure 3.** The response of cations ( $\text{Ca}^{2+}$ ,  $\text{Mg}^{2+}$ ,  $\text{Mn}^{2+}$ ,  $\text{Sr}^{2+}$ ) concentrations and ratio ( $[\text{Ca}^{2+}]:[\text{Mg}^{2+}]$  and  $[\text{Ca}^{2+}]:[\text{Sr}^{2+}]$ ) within the carapace and claws of porcelain crabs was variable across species with reduced pH/high  $\text{CO}_2$ . Each point represents the mean  $\pm$  SEM for  $n = 4-15$  individuals per species per treatment at each pH. Circle symbols are for crabs found in the mid intertidal zone, and squares for crabs in the low zone. Black symbols are for crabs from the UK and white symbols for crabs from California. Columns are split into carapace or claw. Statistical analyses are presented in Tables 2–4.

mid-intertidal *P. cinctipes* at pH 7.4 was 12% lower than in the low-intertidal *P. manimaculis*, and 35% lower at pH 8.0 (ANOVA  $p < 0.05$ , Supplementary Table S5, Figure 5). Carapace  $[\text{Ca}^{2+}]:[\text{Mg}^{2+}]$  was not significantly impacted by location in the intertidal (ANOVA  $p > 0.05$ , Supplementary Table S7). Carapace  $[\text{Sr}^{2+}]$  did not vary with respect to intertidal zonation (ANOVA  $p > 0.05$ , Supplementary Table S5, Figure 5); however, claw  $[\text{Ca}^{2+}]:[\text{Sr}^{2+}]$  was higher in the mid-intertidal crabs (ANOVA  $p < 0.05$ , Supplementary Table S7, Figure 5).

**Table 2.** Results from a linear regression model conducted on each ion and the effect of pH on these ions from pH 8.0 to pH 7.4

| Species               | Ion              |                  |                  |                  |
|-----------------------|------------------|------------------|------------------|------------------|
|                       | Ca <sup>2+</sup> | Mg <sup>2+</sup> | Mn <sup>2+</sup> | Sr <sup>2+</sup> |
| <b>Carapace</b>       |                  |                  |                  |                  |
| <i>P. cinctipes</i>   | —*               | —                | =                | —                |
| <i>P. manimaculis</i> | —*               | —*               | =                | —*               |
| <i>P. platycheles</i> | —*               | —*               | +*               | +/-              |
| <i>P. longicornis</i> | —*               | —                | —                | —                |
| <b>Claw</b>           |                  |                  |                  |                  |
| <i>P. cinctipes</i>   | —                | —                | =                | —*               |
| <i>P. manimaculis</i> | —*               | —*               | =                | —*               |
| <i>P. platycheles</i> | —                | —                | +*               | =                |
| <i>P. longicornis</i> | —*               | —*               | —                | —*               |

Increases in ion due to lowered pH are symbolized by '+', decreases by '-', no change by '=' and statistically significant changes by '\*'. Full statistical results can be found in Supplementary Tables S5 and S6.

**Table 3.** Results from an ANCOVA applied to linear regression from Table 2 (see Supplementary Tables S5 & S6), testing the significance of slopes found in Figure 3

|                        | d.f. | F     | Sig. |
|------------------------|------|-------|------|
| <b>Carapace</b>        |      |       |      |
| <b>Ca<sup>2+</sup></b> |      |       |      |
| pH                     | 1    | 85.0  | ***  |
| Species                | 3    | 13.5  | ***  |
| Residuals              | 108  |       |      |
| <b>Mg<sup>2+</sup></b> |      |       |      |
| pH                     | 1    | 66.2  | ***  |
| Species                | 3    | 16.7  | ***  |
| Residuals              | 108  |       |      |
| <b>Mn<sup>2+</sup></b> |      |       |      |
| pH                     | 1    | 90.7  | ***  |
| Species                | 3    | 95.2  | ***  |
| Residuals              | 108  |       |      |
| <b>Sr<sup>2+</sup></b> |      |       |      |
| pH                     | 1    | 9.4   | **   |
| Species                | 3    | 0.1   | n.s. |
| Residuals              | 108  |       |      |
| <b>Claw</b>            |      |       |      |
| <b>Ca<sup>2+</sup></b> |      |       |      |
| pH                     | 1    | 9.9   | **   |
| Species                | 3    | 272.8 | ***  |
| Residuals              | 198  |       |      |
| <b>Mg<sup>2+</sup></b> |      |       |      |
| pH                     | 1    | 19.6  | ***  |
| Species                | 3    | 209.4 | ***  |
| Residuals              | 198  |       |      |
| <b>Mn<sup>2+</sup></b> |      |       |      |
| pH                     | 1    | 39.8  | ***  |
| Species                | 3    | 123.4 | ***  |
| Residuals              | 198  |       |      |
| <b>Sr<sup>2+</sup></b> |      |       |      |
| pH                     | 1    | 59.6  | ***  |
| Species                | 3    | 17.1  | ***  |
| Residuals              | 198  |       |      |

Significance p-values: \* < 0.05, \*\* < 0.01, and \*\*\* < 0.001.

## Discussion

We found that closely related porcelain crab species (congeneric and confamilial) living in different intertidal zones vary in their

physiological responses to reduced pH/elevated pCO<sub>2</sub>. We also found that the effects of reduced pH/elevated pCO<sub>2</sub> on exoskeletal mineralization vary between claw and carapace. Our study suggests variation in responses of closely related species to OA may be greater than appreciated, and we conclude that accurately predicting biodiversity responses to OA requires specific taxon-focused investigations.

### Survival probability under ocean acidification

Because low-intertidal zone species have not evolved to tolerate the variable conditions that characterize the high to mid intertidal zone (Stillman and Somero, 1996), low-intertidal zone species could be considered more susceptible to future changes in our environment that will be brought on by global change (Sunday *et al.*, 2011). From our results, the two low-intertidal species, *P. longicornis* and *P. manimaculis*, were the most affected by reduced pH/elevated pCO<sub>2</sub> with 50% mortality in *P. longicornis* occurring after half the duration of the experiment. However, the two mid-intertidal species, *P. platycheles* and *P. cinctipes*, saw zero to minimal mortality at reduced pH/elevated pCO<sub>2</sub>. The variable effects of reduced pH/elevated pCO<sub>2</sub> on survival across porcelain crab species was consistent with adaptation to environmental microhabitat differences from high to low-intertidal zone. Our results support the hypothesis that mid-intertidal zone species are less susceptible to OA than subtidal, or low-intertidal, species (Byrne *et al.*, 2013; Kroeker *et al.*, 2010).

### Exoskeletal mineralization of claws and carapace of porcelain crabs

Reduced carapace Ca<sup>2+</sup>, Mg<sup>2+</sup>, and Mn<sup>2+</sup>, but elevated Sr<sup>2+</sup> concentrations in *P. cinctipes*, *P. manimaculis*, and *P. platycheles* reflect the high elasticity of carapace relative to claw exoskeletons (Maitland, 1992; Boebelmann *et al.*, 2007). Elasticity in the carapace supports greater range of movement for gill ventilation and scaphognothite movement (Maitland, 1992), whereas claws need to be more rigid and mineralized for foraging and defense efficiency (Kropp, 1981). Porcelain crabs are generally filter feeders (Kropp, 1981), but these crabs could use their claws as defense mechanisms or have large claws to ward off other individuals from invading their territory in the intertidal zone (Rypien and Palmer, 2007). In this study, *P. longicornis* had higher carapace [Ca<sup>2+</sup>], and interestingly does not use its claws for defense, using instead agility and speed to avoid predation or competition (Boebelmann *et al.*, 2007), suggesting that claw mineralization of this species may be of little consequence to fitness.

### Ion-specific changes in exoskeleton mineralogy under ocean acidification

Crustaceans are known to extract ions from their carapace to resist the effects of acidification (Wheatly *et al.*, 1991). Carapace [Ca<sup>2+</sup>] in all species decreased with reduced pH/elevated pCO<sub>2</sub>, suggesting that these crabs mobilized mineral from their carapace to support their acid-base regulatory function (Wheatly *et al.*, 1991). Claws remained more mineralized than carapace under reduced pH/elevated pCO<sub>2</sub>, except in *P. longicornis*. Decreased exoskeleton [Ca<sup>2+</sup>] under reduced pH/elevated pCO<sub>2</sub> observed in porcelain crabs is not a general response of decapod crustacea. Exoskeleton [Ca<sup>2+</sup>] was unaffected by reduced pH/elevated pCO<sub>2</sub> in the velvet swimming crab *Necora puber* (Small *et al.*, 2010),

**Table 4.** Results of ANOVAs and Tukey HSD *post-hoc* multiple comparison analyses comparing the effects of lowered pH on the  $[Ca^{2+}]$  to  $[Mg^{2+}]$  ratio within the carapace

| Carapace $[Ca^{2+}]:[Mg^{2+}]$ |      |        |      | Carapace $[Ca^{2+}]:[Sr^{2+}]$ |      |       |      |
|--------------------------------|------|--------|------|--------------------------------|------|-------|------|
| ANOVA                          | d.f. | F      | Sig. | ANOVA                          | d.f. | F     | Sig. |
| <i>P. cinctipes</i> * pH       | 1    | 18.2   | ***  | <i>P. cinctipes</i> * pH       | 1    | 0.2   | n.s. |
| Residuals                      | 22   |        |      | Residuals                      | 22   |       |      |
| <i>P. manimaculis</i> * pH     | 1    | 10.8   | **   | pH                             | 1    | 76.7  | ***  |
| Residuals                      | 24   |        |      | Residuals                      | 24   |       |      |
| <i>P. platycheles</i> * pH     | 1    | 3.7    | n.s. | <i>P. platycheles</i> * pH     | 1    | 0.1   | n.s. |
| Residuals                      | 26   |        |      | Residuals                      | 26   |       |      |
| <i>P. longicornis</i> * pH     | 1    | 223    | ***  | <i>P. longicornis</i> * pH     | 1    | 9.6   | *    |
| Residuals                      | 6    |        |      | Residuals                      | 6    |       |      |
| Claw $[Ca^{2+}]:[Mg^{2+}]$     |      |        |      | Claw $[Ca^{2+}]:[Sr^{2+}]$     |      |       |      |
| ANOVA                          | d.f. | F      | Sig. | ANOVA                          | d.f. | F     | Sig. |
| <i>P. cinctipes</i> * pH       | 1    | 37.3   | ***  | <i>P. cinctipes</i> * pH       | 1    | 159   | ***  |
| Residuals                      | 46   |        |      | Residuals                      | 46   |       |      |
| <i>P. manimaculis</i> * pH     | 1    | 34.7   | ***  | <i>P. manimaculis</i> * pH     | 1    | 82.3  | ***  |
| Residuals                      | 40   |        |      | Residuals                      | 40   |       |      |
| <i>P. platycheles</i> * pH     | 1    | 125    | ***  | <i>P. platycheles</i> * pH     | 1    | 4.25  | *    |
| Residuals                      | 58   |        |      | Residuals                      | 58   |       |      |
| <i>P. longicornis</i> * pH     | 1    | 939482 | ***  | <i>P. longicornis</i> * pH     | 1    | 36277 | ***  |
| Residuals                      | 2    |        |      | Residuals                      | 2    |       |      |

Significance p-values: \* &lt; 0.05, \*\* &lt; 0.01, and \*\*\* &lt; 0.001.

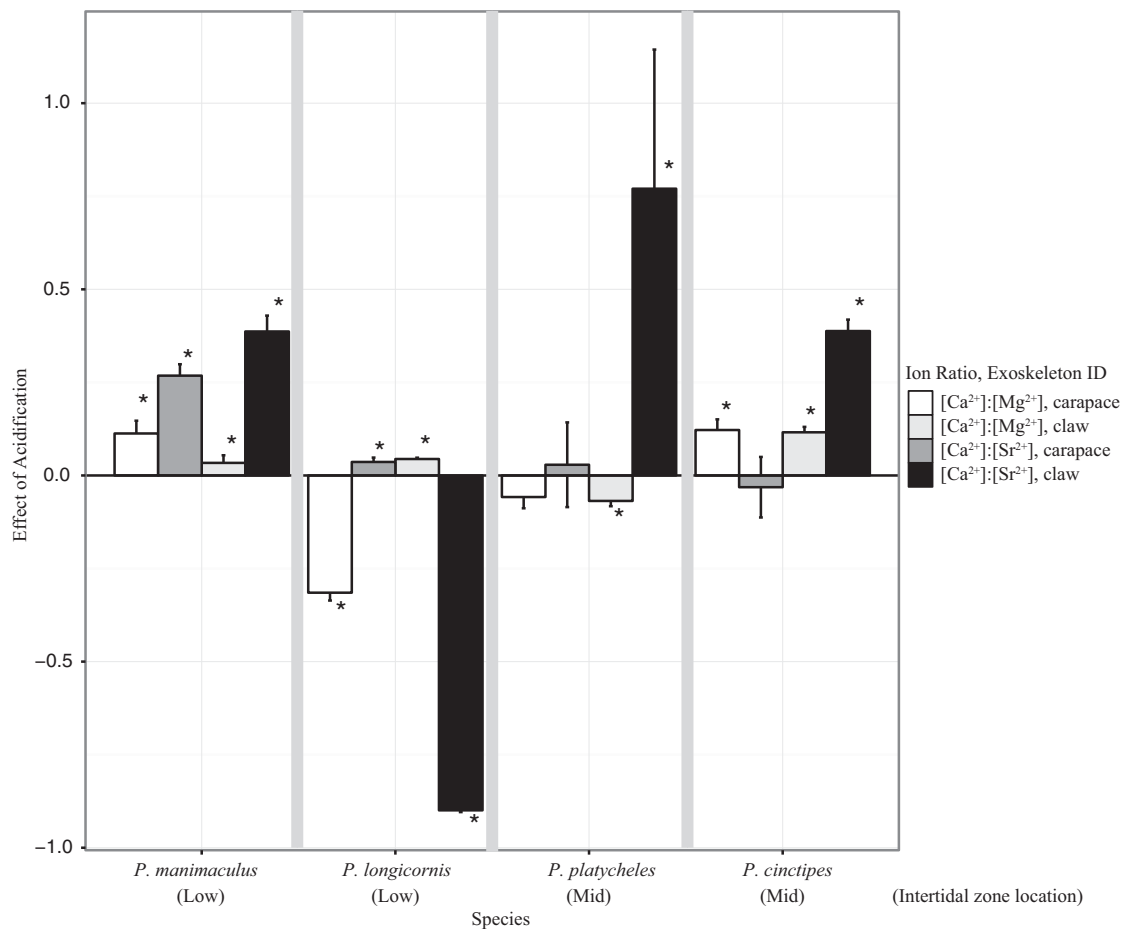**Figure 4.**  $[Ca^{2+}]:[Mg^{2+}]$  and  $[Ca^{2+}]:[Sr^{2+}]$  in the carapace and claw of porcelain crabs responded differentially across species in response to reduced pH/elevated  $pCO_2$ . Each bar represents the mean of the ratio between average ambient  $[Ca^{2+}]:[Mg^{2+}]$  and the treatment  $[Ca^{2+}]:[Mg^{2+}] \pm SEM$  for  $n = 4-15$  individuals per species. Asterisks indicate a statistically significant difference ( $p < 0.05$ ) in the ratio, relative to ambient conditions ( $\sim 8.0$  pH).



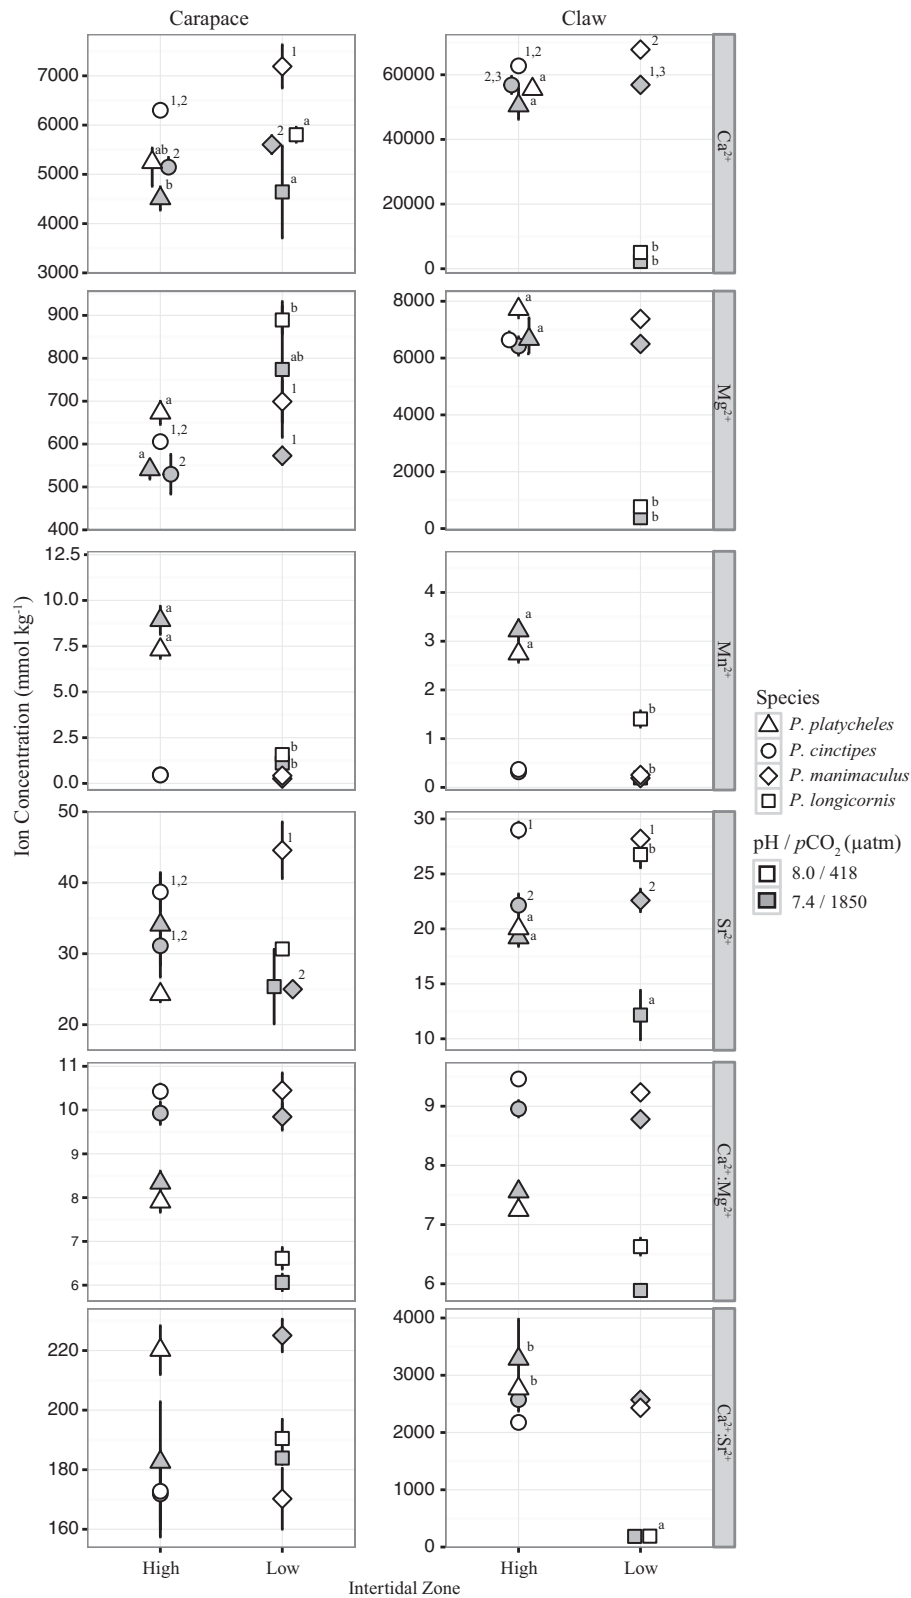

**Figure 5.** There was a differential response to reduced pH/elevated  $p\text{CO}_2$  when looking across intertidal zones, high and low, and cation ( $\text{Ca}^{2+}$ ,  $\text{Mg}^{2+}$ ,  $\text{Mn}^{2+}$ ,  $\text{Sr}^{2+}$ ) concentrations and ratios ( $[\text{Ca}^{2+}]:[\text{Mg}^{2+}]$  and  $[\text{Ca}^{2+}]:[\text{Sr}^{2+}]$ ) within the carapace and claws of porcelain crabs. Species are divided on the x-axis by vertical distribution in the intertidal zone. Each point represents the mean  $\pm$  SEM for  $n = 4-15$  individuals *per species per treatment* at each pH. Letters above points indicate statistically significant differences ( $p < 0.05$ ) between United Kingdom high- and low-intertidal species. Numbers above points indicate statistically significant differences ( $p < 0.05$ ) between United States high- and low-intertidal species. ANOVA results can be found in the [Supplementary Tables S5 and S6](#). Points were manually jittered when symbols overlapped.

**Table 5.** Seawater carbonate system calculations (i.e. TA,  $p\text{CO}_2$ ,  $[\text{HCO}_3^-]$ ,  $[\text{CO}_3^{2-}]$ , DIC,  $\Omega_{\text{calcite}}$ , and  $\Omega_{\text{aragonite}}$ ) from the United States and United Kingdom.

| Location                                       | California USA      |                       | Plymouth, UK        |                       |                     |
|------------------------------------------------|---------------------|-----------------------|---------------------|-----------------------|---------------------|
| Parameter                                      | US Ambient (pH 8.0) | US Acidified (pH 7.4) | UK Ambient (pH 8.0) | UK Acidified (pH 7.4) | UK Extreme (pH 7.0) |
| Salinity                                       | 34.4 ± 0.3          | 34.03 ± 0.09          | 34.1 ± 0.1          | 34.1 ± 0.1            | 34                  |
| Temperature (°C)                               | 13.0 ± 0.3          | 13.0 ± 0.2            | 15.5 ± 0.3          | 15.5 ± 0.3            | 15.4 ± 0.1          |
| pH <sub>T</sub>                                | 7.98 ± 0.01         | 7.41 ± 0.02           | 8.07 ± 0.01         | 7.5 ± 0.05            | 7.00 ± 0.02         |
| TA (μequiv kg <sup>-1</sup> )                  | 2104.4 ± 23.4       | 2101.3 ± 25.6         | 2469.7 ± 35.1       | 2432.8 ± 34.6         | 2492.4 ± 22.6       |
| DIC*                                           | 1938.4 ± 20.3       | 2120.1 ± 30.8         | 2225.3 ± 35.4       | 2423.92 ± 46.7        | 2682.2 ± 20.2       |
| $p\text{CO}_2$ (μatm)*                         | 430.4 ± 4.1         | 1816.66 ± 109.02      | 407.3 ± 19.8        | 1881.6 ± 190.5        | 5821.7 ± 202.1      |
| $[\text{HCO}_3^-]$ (μmol kg <sup>-1</sup> )*   | 1803.03 ± 17.80     | 2012.8 ± 27.8         | 2031.95 ± 35.1      | 2300.3 ± 46.3         | 2448.6 ± 21.3       |
| $[\text{CO}_3^{2-}]$ (μmol kg <sup>-1</sup> )* | 118.2 ± 2.7         | 34.8 ± 1.4            | 178.3 ± 5.4         | 53.8 ± 8.1            | 17.9 ± 0.8          |
| $\Omega_{\text{ara}}$ *                        | 1.81 ± 0.04         | 0.53 ± 0.02           | 2.7 ± 0.1           | 0.83 ± 0.1            | 0.28 ± 0.01         |
| $\Omega_{\text{cal}}$ *                        | 2.83 ± 0.07         | 0.83 ± 0.03           | 4.3 ± 0.1           | 1.3 ± 0.2             | 0.01 ± 0.43         |

Values represent the mean ± 1 SD. \*indicates parameters calculated using R package seacarb (version 2.4.10).

and increased under reduced pH/elevated  $p\text{CO}_2$  in red king crabs *Paralithodes camtschaticus* (Long et al., 2013).

Decreased carapace and claw  $[\text{Mg}^{2+}]$ , as seen under reduced pH/elevated  $p\text{CO}_2$  across all four porcelain crab species in this study, indicates weakening of the exoskeleton (Horne and Tarsitano, 2007) and may delay rapid formation of calcified exoskeleton after a molt (Tao et al., 2009), making the post-molt crabs even more vulnerable to predation. Claw, but not carapace,  $[\text{Mg}^{2+}]$  has been shown to increase under reduced pH/elevated  $p\text{CO}_2$  in *N. puber* (Small et al., 2010), but the opposite was observed in porcelain crabs as these crabs likely are putting more effort into maintaining the mineralization levels within the claw than the carapace. Alternatively, it is possible that crabs are not putting more effort into maintaining mineralization in the claws, but the mineral phase in the carapace is more easily and/or quickly accessible via potential superficial degradation of the exoskeleton cuticle. This could ultimately result in the carapace being more soluble or easier to degrade.

Elevated  $[\text{Mn}^{2+}]$  in *P. platycheles* exoskeleton could be related to the dense setae on this species. Those setae, which are typically chitinous (Goffredi et al., 2008), may account for the observed higher  $[\text{Mn}^{2+}]$  levels under ambient conditions, as chitin absorbs  $\text{Mn}^{2+}$  (Robinson-Lora and Brennan, 2010). Urbanization is known to increase  $\text{Mn}^{2+}$  bioavailability (Baden and Eriksson, 2006), and possibly *P. platycheles* had higher  $[\text{Mn}^{2+}]$  simply because it was collected at a site near a harbor.

Intertidal zonation has previously been suggested to be an important determinant in exoskeleton ion composition (Gibbs and Bryan, 1972). That premise was not strongly supported by our data, with the only difference found between intertidal zones at one site was elevated  $[\text{Sr}^{2+}]$  in *P. longicornis* (low-zone) relative to *P. platycheles* (mid-zone).  $\text{Sr}^{2+}$  may replace  $\text{Ca}^{2+}$  to defend mineralization status (de Lima et al., 2011), and reduced  $[\text{Sr}^{2+}]$  under OA in porcelain crabs could be detrimental.  $\text{Sr}^{2+}$  does not play a large role in biomineralized structures of crayfish (Horne et al., 2009), but in mussels shell  $[\text{Sr}^{2+}]$  correlated positively with growth and negatively with final size (Dodd, 1964). Whether  $[\text{Sr}^{2+}]$  is correlated to size relationships and if that is important in crabs remains unknown.

#### Altered ion ratios under ocean acidification

Decreases in  $[\text{Ca}^{2+}]:[\text{Mg}^{2+}]$  under reduced pH/elevated  $p\text{CO}_2$ , as was observed in the carapace of *P. longicornis* and the claw of *P. platycheles*, indicate a weaker exoskeleton prone to dissolution

(Findlay et al., 2010). Reduced  $[\text{Ca}^{2+}]:[\text{Mg}^{2+}]$  under reduced pH/elevated  $p\text{CO}_2$  was not observed across all species and exoskeletal regions, suggesting that mineralized structures are actively mobilized for acid-base regulation to counteract the effects of reduced pH/elevated  $p\text{CO}_2$ , as has been shown in urchins, bivalve molluscs and crustaceans (Calosi et al., 2013a; Michaelidis et al., 2005).  $[\text{Ca}^{2+}]:[\text{Sr}^{2+}]$  could be a proxy of calcification rate (Rickaby et al., 2002), and an increase in the  $\text{Sr}^{2+}$  fraction (and thus a resulting reduction of  $[\text{Ca}^{2+}]:[\text{Sr}^{2+}]$ ) may aid growth, as observed in the claw of *P. longicornis* (Figure 3). *P. manimaculis*, had the greatest increase in exoskeleton  $[\text{Ca}^{2+}]:[\text{Sr}^{2+}]$  under reduced pH/elevated  $p\text{CO}_2$ , which suggests more strongly reduced calcification under OA as compared with the other three species.

#### Extant levels of adaptation and sensitivity to ocean acidification

Physiological adaptation to environmental variability that characterizes coastal habitats may grant organisms some protection from the negative effects of OA (Sunday et al., 2011; Engström-Öst et al., 2014; Magozzi and Calosi, 2015). The largest pH-related changes in ion concentrations were observed in the low-intertidal zone species *P. manimaculis*. However, if a larger sample size of *P. longicornis* were available after the 24-day low-pH exposure (i.e. much greater starting sample size to make up for elevated mortality), we would expect a similar shift of ion concentrations in this species as well. Ion composition of claw and carapace exoskeleton, based on our data for how elevated  $p\text{CO}_2$  induced changes in  $[\text{Ca}^{2+}]$ ,  $[\text{Mg}^{2+}]$  and  $[\text{Sr}^{2+}]$ , as well as organismal survival and exoskeletal dissolution, suggests that low intertidal zone species are more susceptible to OA than closely related taxa that live higher on the shore.

#### Conclusions

Comparisons of biomineralization responses to reduced pH/elevated  $p\text{CO}_2$  among closely related species allows us to examine the generalizability of physiological response, how responses vary with respect to microhabitat variation, and extant levels of adaptation. Here, in four species of porcelain crabs from different intertidal zones and coastal regions we show that despite the existence of species-specific differences in responses to reduced pH/elevated  $p\text{CO}_2$ , species adapted to intertidal zone variability are in general better able to withstand the changes in pH associated with OA. Our results emphasize the importance of existing

level of adaptation and phylogenetic considerations in informing generalized conclusions regarding physiological responses to OA.

## Supplementary data

Supplementary material is available at the ICESJMS online version of the article.

## Funding

This research was supported by the National Science Foundation (grant no. 1041225 to J.H.S.), CSU COAST (Research and Travel Awards), COSE IRA Student Materials Award, a James C. Kelley Scholarship, and San Francisco Bay Scholarships (Romberg Tiburon Center) to T.M.P., and the UKOA Research Program Benthic Consortium no. (NE/H017127/1). P.C. is supported by a NSERC Discovery Programme grant, and a FRQ-NT New University Researchers Start Up program grant.

## Acknowledgement

We thank Eric Armstrong, Dr Nathan Miller, and Marie Palmer for their support in carrying out the experiments.

## References

- Almén, A. K., Vehmaa, A., Brutemark, A., and Engström-Öst, J. 2014. Coping with climate change? Copepods experience drastic variations in their physicochemical environment on a diurnal basis. *Journal of Experimental Biology and Ecology*, 460: 120–128.
- Amaral, V., Cabral, H., and Bishop, M. 2012. Effects of estuarine acidification on predator–prey interactions. *Marine Ecology Progress Series*, 445: 117–127.
- Baden, S. P., and Eriksson, S. P. 2006. Role, Routes and effects of manganese in crustaceans. *Oceanography and Marine Biology: An Annual Review*, 44: 61–83.
- Bednaršek, N., Tarling, G. A., Bakker, D. C., Fielding, S., Cohen, A., Kuzirian, A., McCorkle, D., *et al.* 2012. Description and quantification of pteropod shell dissolution: a sensitive bioindicator of ocean acidification. *Global Change Biology*, 18: 2378–2388.
- Boßelmann, F., Romano, P., Fabritius, H., Raabe, D., and Epple, M. 2007. The composition of the exoskeleton of two crustacea: The American lobster *Homarus americanus* and the edible crab *Cancer pagurus*. *Thermochimica Acta*, 463: 65–68.
- Bradshaw, A. L., Brewer, P. G., Shafer, D. K., and Williams, R. T. 1981. Measurements of total carbon dioxide and alkalinity by potentiometric titration in the GEOSECS program. *Earth and Planetary Science Letters* 55: 99–115.
- Byrne, M., Lamare, M., Winter, D., Dworjanyn, S. A., and Uthicke, S. 2013. The stunting effect of a high CO<sub>2</sub> ocean on calcification and development in sea urchin larvae, a synthesis from the tropics to the poles. *Philosophical Transactions of the Royal Society of London. Series B, Biological Sciences*, 368: 1–13.
- Calosi, P., Rastrick, S. P. S., Graziano, M., Thomas, S. C., Baggini, C., Carter, H. A., Hall-Spencer, J. M., *et al.* 2013a. Distribution of sea urchins living near shallow water CO<sub>2</sub> vents is dependent upon species acid-base and ion-regulatory abilities. *Marine Pollution Bulletin*, 73: 470–484.
- Calosi, P., Rastrick, S. P. S., Lombardi, C., de Guzman, H. J., Davidson, L., Jahnke, M., Giangrande, A., *et al.* 2013b. Adaptation and acclimatization to ocean acidification in marine ectotherms: an in situ transplant experiment with polychaetes at a shallow CO<sub>2</sub> vent system. *Philosophical Transactions of the Royal Society of London. Series B, Biological Sciences*, 368: 1471–2970.
- Ceballos-Osuna, L., Carter, H. A., Miller, N. A., and Stillman, J. H. 2013. Effects of ocean acidification on early life-history stages of the intertidal porcelain crab *Petrolisthes cinctipes*. *The Journal of Experimental Biology*, 216: 1405–1411.
- Chan, V. B. S., Li, C., Lane, A. C., Wang, Y., Lu, X., Shih, K., Zhang, T., *et al.* 2012. CO<sub>2</sub>-driven ocean acidification alters and weakens integrity of the calcareous tubes produced by the serpulid tube-worm, *Hydroides elegans*. *PLoS One*, 7: e42718.
- Cohen, A. L., McCorkle, D. C., de Putron, S., Gaetani, G. A., and Rose, K. A. 2009. Morphological and compositional changes in the skeletons of new coral recruits reared in acidified seawater: Insights into the biomineralization response to ocean acidification. *Geochemistry, Geophysics, Geosystems*, 10: 1–12.
- Collins, M., Knutti, R., Arblaster, J., Dufresne, J. L., Fichet, T., Friedlingstein, P., Gao, X., *et al.* 2013. Long-term Climate Change: Projections, Commitments and Irreversibility. In *Climate Change 2013: The Physical Science Basis. Contribution of Working Group I to the Fifth Assessment Report of the Intergovernmental Panel on Climate Change*. Cambridge University Press, Cambridge.
- Davenport, J. 1972. Salinity tolerance and preference in the porcelain crabs, *Porcellana platycheles* and *Porcellana* salinity tolerance and preference in the porcelain crabs, *Porcellana platycheles* and *Porcellana longicornis*. *Marine Behaviour and Physiology*, 1: 123–138.
- de Lima, I. R., Alves, G. G., Soriano, C. A., Campanelli, A. P., Gasparoto, T. H., Ramos, E. S., de Sena, L., *et al.* 2011. Understanding the impact of divalent cation substitution on hydroxyapatite: an in vitro multiparametric study on biocompatibility. *Journal of Biomedical Materials Research Part A*, 98: 351–358.
- Dickson, A. G., Sabine, C. L., and Christian, J. R. 2007. Guide to best practices for ocean CO<sub>2</sub> measurements, PICES Special Publication, vol. 3, pp. 1–191.
- Dodd, J. R. 1964. Environmental control of strontium and magnesium in. *Geochimica et Cosmochimica Acta*, 29: 385–398.
- Engström-Öst, J., Holmborn, T., Brutemark, A., and Hogfors, H., and Vehmaa, A., and Gorokhova, E. 2014. The effects of short-term pH decrease on the reproductive output of the copepod *Acartia bifilosa* - a laboratory study. *Marine and Freshwater Behavior and Physiology*, 47: 173–183.
- Findlay, H. S., Kendall, M. A., Spicer, J. I., and Widdicombe, S. 2010. Relative influences of ocean acidification and temperature on intertidal barnacle post-larvae at the northern edge of their geographic distribution. *Estuarine, Coastal and Shelf Science*, 86: 675–682.
- Gibbs, P. E., and Bryan, G. W. 1972. A study of strontium, magnesium, and calcium in the environment and exoskeleton of decapod crustaceans, with special reference to *Uca burgersi* on Barbuda, West Indies. *Journal of Experimental Marine Biology and Ecology*, 9: 97–110.
- Goffredi, S. K., Jones, W. J., Erhlich, H., Springer, A., and Vrijenhoek, R. C. 2008. Epibiotic bacteria associated with the recently discovered Yeti crab, *Kiwa hirsuta*. *Environmental Microbiology*, 10: 2623–2634.
- Gruber, N., Hauri, C., Lachkar, Z., Loher, D., Frölicher, T. L., and Plattner, G. K. 2012. Rapid progression of ocean acidification in the California Current System. *Science*, 337: 220–223.
- Horne, F. R., and Tarsitano, S. 2007. The mineralization and biomechanics of the exoskeleton. In *The Biology and Fisheries of the Slipper Lobster*, pp. 183–189. CRC Press, New York.
- Horne, F., Tarsitano, S., and Lavalli, K. 2009. Aspects of mineralization of the cuticle of the crayfish, *Procambarus clarkii* (Decapoda, Cambaridae). *Crustaceana*, 82: 1057–1065.
- Jack, L., Wing, S., Hu, Y., and Roberts, M. 2011. Natural trace elemental markers for adult red rock lobsters *Jasus edwardsii* vary among replicate distinct water masses. *Marine Ecology Progress Series*, 443: 141–151.
- Kroeker, K. J., Kordas, R. L., Crim, R. N., and Singh, G. G. 2010. Meta-analysis reveals negative yet variable effects of ocean acidification on marine organisms. *Ecology Letters*, 13: 1419–1434.
- Kropp, R. K. 1981. Additional porcelain crab feeding methods (Decapoda, Porcellanidae). *Crustaceana*, 40: 307–310.

- Lavigne, A. H., Epitalon, J., and Gattuso, J. P. 2013. *seacarb*: Seawater carbonate chemistry with R. R package version 2.4.8, 2.4.10 edn. <http://cran.r-project.org/package=seacarb>.
- Lewis, C. N., Brown, K. A., Edwards, L. A., Cooper, G., and Findlay, H. S. 2013. Sensitivity to ocean acidification parallels natural pCO<sub>2</sub> gradients experienced by Arctic copepods under winter sea ice. *Proceedings of the National Academy of Sciences USA* 110. DOI: 10.1073/pnas.131516210.
- Long, C. W., Swiney, K. M., and Foy, R. J. 2013. Effects of ocean acidification on the embryos and larvae of red king crab, *Paralithodes camtschaticus*. *Marine Pollution Bulletin*, 69: 38–47.
- Maas, A. E., Wishner, K. F., and Seibel, B. A. 2012. The metabolic response of pteropods to acidification reflects natural CO<sub>2</sub>-exposure in oxygen minimum zones. *Biogeosciences*, 9: 747–757.
- Magozzi, S., and Calosi, P. 2015. Integrating metabolic performance, thermal tolerance, and plasticity enables for more accurate predictions on species vulnerability to acute and chronic effects of global warming. *Global Change Biology*, 21: 181–194.
- Maitland, D. P. 1992. Carapace movements aid air breathing in the semaphore crab, *Teloeoicus cordiformis* (Decapoda:Brachyura: Ocypodidae). *Journal of Comparative Physiology B*, 162: 375–382.
- McElhany, P. 2017. CO<sub>2</sub> sensitivity experiments are not sufficient to show an effect of ocean acidification. *ICES Journal of Marine Science*, 74: 926–928.
- Meehl, G. A., Stocker, T. F., Collins, W. D., Friedlingstein, P., Gaye, A. T., Gregory, J. M., Kitoh, A., et al. 2007. Global Climate Projections. In *Climate Change 2007: The Physical Science Basis. Contribution of Working Group I to the Fourth Assessment Report of the Intergovernmental Panel on Climate Change*. Geneva, Switzerland. 104 pp.
- Melatunan, S., Calosi, P., Rundle, S. D., Moody, A. J., and Widdicombe, S. 2011. Exposure to elevated temperature and pCO<sub>2</sub> reduces respiration rate and energy status in the periwinkle *Littorina littorea*. *Physiological and Biochemical Zoology*: PBZ, 84: 583–594.
- Michaelidis, B., Ouzounis, C., Paleras, A., and Pörtner, H. O. 2005. Effects of long-term moderate hypercapnia on acid–base balance and growth rate in marine mussels *Mytilus galloprovincialis*. *Marine Ecology Progress Series*, 293: 109–118.
- Miles, H., Widdicombe, S., Spicer, J. I., and Hall-Spencer, J. 2007. Effects of anthropogenic seawater acidification on acid–base balance in the sea urchin *Psammechinus miliaris*. *Marine Pollution Bulletin*, 54: 89–96.
- Morris, R. H., Abbott, D. P., and Haderlie, H. C. 1980. *Intertidal Invertebrates of California*. Stanford University Press, Stanford.
- Morris, S., and Taylor, A. C. 1983. Diurnal and seasonal variation in physico-chemical conditions within intertidal rock pools. *Estuarine, Coastal and Shelf Science*, 17: 339–355.
- Nagasawa, H. 2012. The crustacean cuticle: structure, composition and mineralization. *Frontiers in Bioscience, (Elite Edition)*, 4: 711–720.
- Noisette, F., Comtet, T., Legrand, E., Bordeyne, F., Davoult, D., and Martin, S. 2014. Does encapsulation protect embryos from the effects of ocean acidification? The example of *Crepidula fornicata*. *PLoS One*, 9: 1–11.
- Pachauri, R. K., and Meyer, L. A. 2014. *Climate Change 2014 Synthesis Report. Contribution of Working Groups I, II, and III to the Fifth Assessment Report of the Intergovernmental Panel on Climate Change*. Geneva, Switzerland. 151 pp.
- Paganini, A. W., Miller, N. A., and Stillman, J. H. 2014. Temperature and acidification variability reduce physiological performance in the intertidal zone porcelain crab *Petrolisthes cinctipes*. *The Journal of Experimental Biology*, 217: 3974–3980.
- Parker, L. M., Ross, P. M., and O'Connor, W. A. 2010. Populations of the Sydney rock oyster, *Saccostrea glomerata*, vary in response to ocean acidification. *Marine Biology* 158: 689–697.
- R Core Team. 2014. R: A language and environment for statistical computing. R Foundation for Statistical Computing, Vienna, Austria.
- Rastrick, S. P. S., Calosi, P., Calder-Potts, R., Foggo, A., Nightingale, G., Widdicombe, S., and Spicer, J. I. 2014. Living in warmer, more acidic oceans retards physiological recovery from tidal emersion in the velvet swimming crab, *Necora puber*. *The Journal of Experimental Biology*, 217: 2499–2508.
- Rickaby, R. E. M., Schrag, D. P., Zondervan, I., and Riebesell, U. 2002. Growth rate dependence of Sr incorporation during calcification of *Emiliania huxleyi*. *Global Biogeochemical Cycles*, 16: 1–8.
- Ries, J. B. 2011. Skeletal mineralogy in a high-CO<sub>2</sub> world. *Journal of Experimental Marine Biology and Ecology*, 403: 54–64.
- Robinson-Lora, M. A., and Brennan, R. A. 2010. Biosorption of manganese onto chitin and associated proteins during the treatment of mine impacted water. *Chemical Engineering Journal*, 162: 565–572. Elsevier B.V.
- Rypien, K. L., and Palmer, A. R. 2007. The effect of sex, size and habitat on the incidence of puncture wounds in the claws of the porcelain crab *Petrolisthes cinctipes* (Anomura: Porcellanidae). *Journal of Crustacean Biology*, 27: 59–64.
- Sabine, C. L., Feely, R. A., Gruber, N., Key, R. M., Lee, K., Bullister, J. L., Wanninkhof, R., et al. 2004. The oceanic sink for anthropogenic CO<sub>2</sub>. *Science*, 305: 367–371.
- Small, D., Calosi, P., White, D., Spicer, J., and Widdicombe, S. 2010. Impact of medium-term exposure to CO<sub>2</sub> enriched seawater on the physiological functions of the velvet swimming crab *Necora puber*. *Aquatic Biology*, 10: 11–21.
- Stillman, J. H., and Paganini, A. W. 2015. Biochemical adaptation to ocean acidification. *The Journal of Experimental Biology*, 218: 1946–1955.
- Stillman, J. H., and Somero, G. N. 2000. A comparative analysis of the upper thermal tolerance limits of eastern Pacific porcelain crabs, genus *Petrolisthes*: influences of latitude, vertical zonation, acclimation, and phylogeny. *Physiological and Biochemical Zoology*, 73: 200–208.
- Stillman, J., and Somero, G. 1996. Adaptation to temperature stress and aerial exposure in congeneric species of intertidal porcelain crabs (genus *Petrolisthes*): correlation of physiology, biochemistry and morphology with vertical distribution. *The Journal of Experimental Biology*, 199: 1845–1855.
- Sunday, J. M., Bates, A. E., and Dulvy, N. K. 2011. Global analysis of thermal tolerance and latitude in ectotherms. *Proceedings. Biological Sciences/the Royal Society*, 278: 1823–1830.
- Tao, J., Zhou, D., Zhang, Z., Xu, X., and Tang, R. 2009. Magnesium-aspartate-based crystallization switch inspired from shell molt of crustacean. *Proceedings of the National Academy of Sciences of the United States of America*, 106: 22096–22101.
- Walther, K., Sartoris, F. J., and Pörtner, H. O. 2011. Impacts of temperature and acidification on larval calcium incorporation of the spider crab *Hyas araneus* from different latitudes (54° vs. 79°N). *Marine Biology*, 158: 2043–2053.
- Wheatly, M. G., Toop, T., Morrison, R. J., and Yow, L. C. 1991. Physiological Responses of the Crayfish *Pacifastacus leniusculus* (Dana) to Environmental Hyperoxia. III. Intracellular Acid-Base Balance. *Physiological Zoology*, 64: 323–343.
- Wickins, J. F. 1984. The effect of hypercapnic sea water on growth and mineralization in penaeid prawns. *Aquaculture*, 41: 37–48.
- Widdicombe, S., and Needham, H. R. 2007. Impact of CO<sub>2</sub>-induced seawater acidification on the burrowing activity of *Nereis virens* and sediment nutrient flux. *Marine Ecology Progress Series*, 341: 111–122.
- Wolf, R. E., and Adams, M. 2015. Multi-elemental analysis of aqueous geochemical samples by quadrupole inductively coupled plasma-mass spectrometry (ICP-MS): U.S. Geological Survey Open-File Report 2015-1010, 34.
